# Supplementary material for: Individualized Prediction of SARS-CoV-2 Infection in Mexico City Municipality during the First Six Waves of the Pandemic
Source: MDPI journal article supplement (doi:10.3390/healthcare12070764), 2024-03-31
Supplement: s1 [file s1]

## Supplementary Material

**Table S1.** Prevalence of symptoms (positive and negative for each wave).

| Symptom        | Wave 1                 |                       | Wave 2                 |                        | Wave 3                 |                        | Wave 4                 |                        | Wave 5                |                       | Wave 6                |                        |
|----------------|------------------------|-----------------------|------------------------|------------------------|------------------------|------------------------|------------------------|------------------------|-----------------------|-----------------------|-----------------------|------------------------|
|                | Positive<br>(N = 1119) | Negative<br>(N = 874) | Positive<br>(N = 6372) | Negative<br>(N = 5363) | Positive<br>(N = 5435) | Negative<br>(N = 7658) | Positive<br>(N = 1150) | Negative<br>(N = 3229) | Positive<br>(N = 298) | Negative<br>(N = 616) | Positive<br>(N = 960) | Negative<br>(N = 1532) |
| Cough          | 80.8                   | 61.8 *                | 51.4                   | 22.4 *                 | 62.5                   | 21.3 *                 | 48.7                   | 14.8 *                 | 81.1                  | 19.3 *                | 63.2                  | 54.1*                  |
| Rhinorrhea     | 34.4                   | 27.0 *                | 27.8                   | 9.0 *                  | 26.7                   | 6.5 *                  | 28.3                   | 11.0 *                 | 37.4                  | 5.4 *                 | 41.4                  | 35.8*                  |
| Dyspnea        | 46.7                   | 26.2 *                | 9.9                    | 5.1 *                  | 8.5                    | 3.9*                   | 2.5                    | 1.7                    | 20.9                  | 4.5 *                 | 9.8                   | 14.6*                  |
| Polypnea       | 21.4                   | 12.1 *                | 3.2                    | 1.6 *                  | 3.1                    | 1.1*                   | 0.1                    | 0.1                    | 2.7                   | 0.5*                  | 3.2                   | 4.9                    |
| Cyanosis       | 6.9                    | 4.2                   | 1.9                    | 0.7 *                  | 1.4                    | 0.5*                   | 0.1                    | 0.1                    | 0.7                   | 0.2                   | 0.9                   | 1.9                    |
| Odynophagia    | 46.8                   | 41.4                  | 28.6                   | 11.2 *                 | 29.0                   | 6.9 *                  | 37.6                   | 11.4 *                 | 37.2                  | 7.6 *                 | 41.3                  | 39.3                   |
| Anosmia        | 17.1                   | 8.9 *                 | 19.0                   | 4.8 *                  | 14.3                   | 1.6*                   | 2.0                    | 1.1                    | 2.1                   | 0.7                   | 4.4                   | 2.8                    |
| Dysgeusia      | 17.9                   | 8.1 *                 | 16.8                   | 4.6 *                  | 12.5                   | 1.6*                   | 1.7                    | 0.9                    | 2.8                   | 0.5 *                 | 3.7                   | 2.8                    |
| Diarrhea       | 23.6                   | 20.9                  | 9.6                    | 4.6 *                  | 11.3                   | 6.7 *                  | 5.7                    | 2.8 *                  | 10.4                  | 4.7 *                 | 11.0                  | 9.9                    |
| Abdominal pain | 13.9                   | 12.3                  | 5.3                    | 1.8 *                  | 7.3                    | 3.2 *                  | 3.3                    | 1.5 *                  | 17.2                  | 3.4 *                 | 5.9                   | 7.3                    |
| Vomit          | 9.9                    | 7.1                   | 3.3                    | 1.4 *                  | 4.3                    | 1.5*                   | 2.0                    | 1.1                    | 5.4                   | 1.9 *                 | 3.0                   | 6.3*                   |
| Headache       | 75.2                   | 70.0 *                | 44.4                   | 19.7 *                 | 45.6                   | 15.5 *                 | 32.0                   | 12.3 *                 | 65.0                  | 17.0 *                | 48.1                  | 46.2                   |
| Myalgia        | 59.7                   | 43.8 *                | 25.3                   | 8.2 *                  | 26.2                   | 4.7 *                  | 22.5                   | 6.4 *                  | 48.1                  | 10.7 *                | 34.2                  | 31.3                   |
| Arthralgia     | 55.7                   | 41.3 *                | 21.4                   | 6.2 *                  | 20.8                   | 3.6 *                  | 13.9                   | 3.6 *                  | 30.0                  | 5.9 *                 | 27.6                  | 23.7                   |
| Chest pain     | 31.4                   | 22.0 *                | 14.3                   | 6.0 *                  | 15.4                   | 6.2 *                  | 7.0                    | 2.5 *                  | 30.3                  | 8.6 *                 | 16.8                  | 16.9                   |
| Fever          | 71.8                   | 45.2 *                | 33.4                   | 13.0 *                 | 42.2                   | 10.6 *                 | 18.3                   | 4.2 *                  | 52.7                  | 9.3 *                 | 35.3                  | 31.3                   |
| Chills         | 43.8                   | 29.1 *                | 21.8                   | 6.5 *                  | 27.5                   | 7.2 *                  | 22.0                   | 5.7 *                  | 40.7                  | 6.7 *                 | 28.6                  | 26.6                   |
| Irritability   | 19.4                   | 16.0                  | 8.7                    | 5.1 *                  | 10.1                   | 5.9 *                  | 2.9                    | 0.7 *                  | 13.1                  | 5.4 *                 | 11.6                  | 12.0                   |
| Conjunctivitis | 10.9                   | 11.3                  | 7.3                    | 2.2 *                  | 8.5                    | 2.7*                   | 1.6                    | 1.1                    | 15.5                  | 2.3 *                 | 7.8                   | 10.8                   |

\* p < 0.01 compared with positive test result of the same wave.

**Table S2.** Binary logistic regression analysis to predict an individual SARS-COV-2 test for each wave. Data are presented as odds ratio (95% confidence interval).

| Variable                            | Wave 1                | Wave 2                  | Wave 3                                  | Wave 4                                  | Wave 5                                   | Wave 6                                 |
|-------------------------------------|-----------------------|-------------------------|-----------------------------------------|-----------------------------------------|------------------------------------------|----------------------------------------|
| Age (years)                         | Eliminated            | 1.010 (1.007 – 1.013)   | 1.005 (1.002 – 1.008)                   | Not included                            | 1.023 (1.012 – 1.034) <sup>#</sup>       | 1.014(1.009 – 1.020)                   |
| Female                              | 0.719 (0.536 – 0.966) | Not included            | 0.743 (0.681 – 0.810)                   | Not included                            | Not included                             | Not included                           |
| Smoker                              | Not included          | 1.173 (1.017 – 1.353)   | 0.756 (0.642 – 0.891) <sup>&amp;</sup>  | Not included                            | Eliminated                               | Not included                           |
| Hypertension                        | Eliminated            | Eliminated              | Not included                            | Eliminated                              | Eliminated                               | Not included                           |
| Obesity                             | Not included          | 1.475 (1.199 – 1.815)   | Eliminated                              | Eliminated                              | Eliminated                               | Not included                           |
| Diabetes mellitus                   | Eliminated            | Eliminated              | Eliminated                              | Not included                            | Eliminated                               | Not included                           |
| Contact with a suspi-<br>cious case | Eliminated            | 0.718 (0.660 – 0.782)   | Eliminated                              | Eliminated                              | Eliminated                               | 1.318 (1.082 – 1.604) <sup>&amp;</sup> |
| Cough                               | 1.813 (1.283 – 2.560) | 2.045 (1.853 – 2.256)   | 3.165 (2.883 – 3.475) <sup>*&amp;</sup> | 2.970 (2.479 – 3.558) <sup>*&amp;</sup> | 4.369 (2.756 – 6.926) <sup>*&amp;</sup>  | 1.567(1.316 – 1.864)                   |
| Rhinorrhea                          | Eliminated            | 2.210 (1.951 – 2.503)   | 2.084 (1.821 – 2.384)                   | Eliminated                              | 3.825 (2.302 – 6.355)                    | Eliminated                             |
| Dyspnea                             | 1.493 (1.051 – 2.119) | 0.806 (0.669 – 0.972) * | Eliminated                              | Not included                            | Eliminated                               | 0.534 (0.408 – 0.700) *                |
| Polypnea                            | Eliminated            | 0.565 (0.403 – 0.792)   | Eliminated                              | Not included                            | Not included                             | Not included                           |
| Cyanosis                            | Not included          | Eliminated              | 0.533 (0.318 – 0.892)                   | Not included                            | Not included                             | Not included                           |
| Odynophagia                         | Not included          | 1.498 (1.328 – 1.689)   | 2.266 (1.986 – 2.586) <sup>&amp;</sup>  | 2.231 (1.841 – 2.704) <sup>&amp;</sup>  | Eliminated                               | Not included                           |
| Anosmia                             | Eliminated            | 2.528 (2.034 – 3.142)   | 3.799 (2.819 – 5.120)                   | Not included                            | Not included                             | Not included                           |
| Dysgeusia                           | 3.706 (2.302 – 5.964) | 1.413 (1.127 – 1.771) * | 1.712 (1.257 – 2.332)                   | Not included                            | Not included                             | Not included                           |
| Diarrhea                            | Not included          | Eliminated              | 0.730 (0.620 – 0.860)                   | Eliminated                              | Not included                             | Not included                           |
| Abdominal pain                      | Not included          | Eliminated              | 0.785 (0.632 – 0.973)                   | Eliminated                              | Eliminated                               | Not included                           |
| Vomit                               | Not included          | 0.582 (0.413 – 0.820)   | Eliminated                              | Not included                            | Not included                             | 0.408 (0.260 – 0.639)                  |
| Headache                            | 0.694 (0.491 – 0.982) | 1.590 (1.434 – 1.762) * | 1.713 (1.542 – 1.902) *                 | Eliminated                              | 1.960 (1.277 – 3.006) *                  | Not included                           |
| Myalgia                             | Eliminated            | Eliminated              | 1.871 (1.575 – 2.223)                   | 1.292 (1.014 – 1.647)                   | Eliminated                               | Not included                           |
| Arthralgia                          | Eliminated            | 1.552 (1.334 – 1.806)   | 1.393 (1.148 – 1.689)                   | Eliminated                              | Eliminated                               | Not included                           |
| Chest pain                          | Eliminated            | 1.271 (1.079 – 1.497)   | Eliminated                              | Eliminated                              | Eliminated                               | Not included                           |
| Fever                               | 2.259 (1.655 – 3.083) | 1.864 (1.664 – 2.089)   | 2.959 (2.652 – 3.301) <sup>&amp;</sup>  | 1.631 (1.240 – 2.146)                   | 3.686 (2.355 – 5.768) <sup>&amp;\$</sup> | Not included                           |
| Chills                              | Eliminated            | 1.485 (1.275 – 1.729)   | 1.675 (1.460 – 1.922)                   | 1.518 (1.176 – 1.959)                   | 1.912 (1.156 – 3.164)                    | Not included                           |

---

|                |              |                       |                       |                          |            |              |
|----------------|--------------|-----------------------|-----------------------|--------------------------|------------|--------------|
| Irritability   | Not included | 0.760 (0.628 – 0.920) | 0.805 (0.679 – 0.955) | 2.005 (1.089 – 3.691) &# | Eliminated | Not included |
| Conjunctivitis | Not included | 1.309 (1.025 – 1.670) | Eliminated            | Not included             | Eliminated | Not included |

---

Not included= variable not included in the regression model, Eliminated: Variable eliminated from the regression model.

\*  $p < 0.05$  vs wave 1, &  $p < 0.05$  vs wave 2, #  $p < 0.05$  vs wave 3, \$  $p < 0.05$  vs wave 4, \*  $p < 0.05$  vs wave 5.

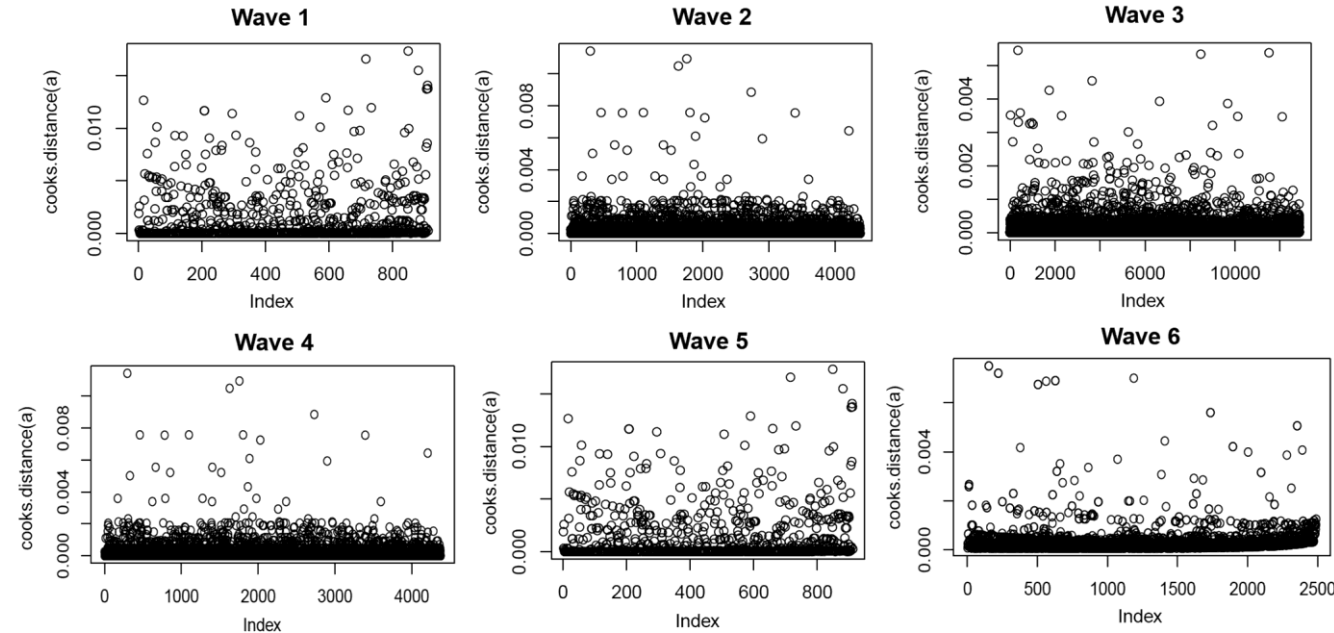

**Figure S1.** Cook’s distance plot was calculated from each wave's final regression model to identify potential influential points.
